# Supplementary material
Source: publisher figshare collection journal article supplement (https://acs.figshare.com/ndownloader/files/17513897)
Supplement: Supplementary file 1 [file 17513897]

## Sheet: Sheet 1 - Sinha-ACSCN-Smiles
Sinha-ACSCN-Smiles
CompNo	Smiles
3a	CN1C2=NC(N3CCNCC3)=NC=C2C=C(C4=C(Cl)C=CC=C4Cl)C1=O
3b	CN1C2=NC(N3CCN(C)CC3)=NC=C2C=C(C4=C(Cl)C=CC=C4Cl)C1=O
3c	CN1C2=NC(N3CCN(CC4=CC=CC=C4)CC3)=NC=C2C=C(C5=C(Cl)C=CC=C5Cl)C1=O
3d	OCCN1CCN(C2=NC=C(C=C3C4=C(Cl)C=CC=C4Cl)C(N(C)C3=O)=N2)CC1
3e	CN1C2=NC(N3CCN(C4=NC=CS4)CC3)=NC=C2C=C(C5=C(Cl)C=CC=C5Cl)C1=O
3f	CN1C2=NC(N3CCN(C4=NC=CC(OC)=N4)CC3)=NC=C2C=C(C5=C(Cl)C=CC=C5Cl)C1=O
3g	ClC(C=CC=C1)=C1N2CCN(C3=NC=C(C=C4C5=C(Cl)C=CC=C5Cl)C(N(C)C4=O)=N3)CC2
3:00:00	CN1C2=NC(N3CCN(C4=C(C(F)(F)F)C=CC=C4)CC3)=NC=C2C=C(C5=C(Cl)C=CC=C5Cl)C1=O
3i	CN1C2=NC(N3CCN(C4=CC=CC=N4)CC3)=NC=C2C=C(C5=C(Cl)C=CC=C5Cl)C1=O
3j	CN1C2=NC(N3CCN(C4=CC=NC=C4)CC3)=NC=C2C=C(C5=C(Cl)C=CC=C5Cl)C1=O
3k	ClC(C=CC=N1)=C1N2CCN(C3=NC=C(C=C4C5=C(Cl)C=CC=C5Cl)C(N(C)C4=O)=N3)CC2
3l	CN1C2=NC(N3CCN(C4CCNCC4)CC3)=NC=C2C=C(C5=C(Cl)C=CC=C5Cl)C1=O
0:03:00	CN(CC1)CCC1N2CCN(C3=NC=C(C=C4C5=C(Cl)C=CC=C5Cl)C(N(C)C4=O)=N3)CC2
3n	O=C(C1=CC=C(OC)N=C1)N2CCN(C3=NC=C(C=C4C5=C(Cl)C=CC=C5Cl)C(N(C)C4=O)=N3)CC2
3o	O=C(C1=CC=CN=C1Cl)N2CCN(C3=NC=C(C=C4C5=C(Cl)C=CC=C5Cl)C(N(C)C4=O)=N3)CC2
3p	O=C(C1=CC=NC(C2CC2)=N1)N3CCN(C4=NC=C(C=C5C6=C(Cl)C=CC=C6Cl)C(N(C)C5=O)=N4)CC3
4a	CN1C2=NC(N(C)C)=NC=C2C=C(C3=C(Cl)C=CC=C3Cl)C1=O
4b	CN1C2=NC(N(CC)CC)=NC=C2C=C(C3=C(Cl)C=CC=C3Cl)C1=O
4c	CN1C2=NC(N3CCOCC3)=NC=C2C=C(C4=C(Cl)C=CC=C4Cl)C1=O
4d	CN1C2=NC(N3CCCCC3)=NC=C2C=C(C4=C(Cl)C=CC=C4Cl)C1=O
4e	CN1C2=NC(N(CCNC)C)=NC=C2C=C(C3=C(Cl)C=CC=C3Cl)C1=O
4f	CN(C1=NC=C(C=C2C3=C(Cl)C=CC=C3Cl)C(N(C)C2=O)=N1)C4C(C=CC=C5)=C5CCC4
4g	OC1CCN(C2=NC=C(C=C3C4=C(Cl)C=CC=C4Cl)C(N(C)C3=O)=N2)CC1
4h	CN1C2=NC(N3CCC(N(C)C)CC3)=NC=C2C=C(C4=C(Cl)C=CC=C4Cl)C1=O
4i	CN1C2=NC(N3CCC(C(F)(F)F)CC3)=NC=C2C=C(C4=C(Cl)C=CC=C4Cl)C1=O
4j	OCC1CN(C2=NC=C(C=C3C4=C(Cl)C=CC=C4Cl)C(N(C)C3=O)=N2)CCC1
4k	CN1C2=NC(N3CCC(C4CCNCC4)CC3)=NC=C2C=C(C5=C(Cl)C=CC=C5Cl)C1=O
4l	CN1C2=NC(N(CC3)CCCN3C4=NC=CC=C4)=NC=C2C=C(C5=C(Cl)C=CC=C5Cl)C1=O
4m	CN1C2=NC(N3CCC(N4CCCCC4)CC3)=NC=C2C=C(C5=C(Cl)C=CC=C5Cl)C1=O
5a	CN1C2=NC(N3CCN(C)CC3)=NC=C2C=C(C4=C(Cl)C=C(NC(OC(C)(C)C)=O)C=C4Cl)C1=O
5b	CN1C2=NC(N3CCN(C4=CC=NC=C4)CC3)=NC=C2C=C(C5=C(Cl)C=C(NC(OC(C)(C)C)=O)C=C5Cl)C1=O
5c	CN(CC1)CCC1N2CCN(C3=NC=C(C=C4C5=C(Cl)C=C(NC(OC(C)(C)C)=O)C=C5Cl)C(N(C)C4=O)=N3)CC2
5d	CN1C2=NC(N3CCN(C)CC3)=NC=C2C=C(C4=C(Cl)C=C(NC(C(C)(C)C)=O)C=C4Cl)C1=O
5e	CN1C2=NC(N3CCN(C4CCNCC4)CC3)=NC=C2C=C(C5=C(Cl)C=C(NC(C(C)(C)C)=O)C=C5Cl)C1=O
5f	CN1C2=NC(N3CCN(C4CCN(C)CC4)CC3)=NC=C2C=C(C5=C(Cl)C=C(NC(C(C)(C)C)=O)C=C5Cl)C1=O
5g	O=C1C(C2=CC=CC=C2)=CC(C=NC(N3CCN(C)CC3)=N4)=C4N1C
5h	O=C1C(C2=C(C)C=CC=C2C)=CC(C=NC(N3CCN(C)CC3)=N4)=C4N1C
5i	O=C1C(C2=C(Cl)C=CC=C2)=CC(C=NC(N3CCN(C)CC3)=N4)=C4N1C
5j	O=C1C(C2=CC(Cl)=CC=C2)=CC(C=NC(N3CCN(C)CC3)=N4)=C4N1C
5k	O=C1C(C2=CC=C(Cl)C=C2)=CC(C=NC(N3CCN(C)CC3)=N4)=C4N1C
5l	O=C1C(C2=CC(Cl)=CC(Cl)=C2)=CC(C=NC(N3CCN(C)CC3)=N4)=C4N1C
5m	O=C1C(C2=C(Cl)C=C(Cl)C=C2)=CC(C=NC(N3CCN(C)CC3)=N4)=C4N1C
5n	O=C1C(C2=CC=C(NC(OC(C)(C)C)=O)C=C2)=CC(C=NC(N3CCN(C)CC3)=N4)=C4N1C
